# Supplementary material
Source: PubMed Central journal article supplement (PMC3410639)
Supplement: NIHMS393628-supplement-05.pdf [file NIHMS393628-supplement-05.pdf]

**Table S3. List of Transgenic Strains, Related to Experimental Procedures**

|       |                                                                                                                                    |
|-------|------------------------------------------------------------------------------------------------------------------------------------|
| WM274 | neSi14 [ <i>flag::prg-1, cb-unc-119(+)</i> ] II; <i>prg-1(tm872)</i> I                                                             |
| WM275 | neSi15 [ <i>flag::prg-1(D583A), cb-unc-119(+)</i> ] II; <i>prg-1(tm872)</i> I                                                      |
| WM276 | neSi16 [21U Reporter 1, <i>cb-unc-119(+)</i> ] II.<br>(GFP silenced)                                                               |
| WM277 | neSi17 [21U Reporter 2, <i>cb-unc-119(+)</i> ] II.<br>(GFP silenced)                                                               |
| WM278 | neSi18 [21U Reporter 1, <i>cb-unc-119(+)</i> ] II; <i>prg-1(tm872)</i> I<br>(direct injection into <i>prg-1</i> , GFP expressed)   |
| WM279 | neSi16 [21U Reporter 1, <i>cb-unc-119(+)</i> ] II; <i>prg-1(tm872)</i> I*<br>(*WM276 out-crossed to <i>prg-1</i> , GFP silenced)   |
| WM280 | neSi17 [21U Reporter 2, <i>cb-unc-119(+)</i> ] II; <i>prg-1(tm872)</i> I*<br>(*WM277 out-crossed to <i>prg-1</i> , GFP silenced)   |
| WM281 | neSi16 [21U Reporter 1, <i>cb-unc-119(+)</i> ] II; <i>rde-3(ne3370)</i> I*<br>(*WM276 out-crossed to <i>rde-3</i> , GFP expressed) |
| WM282 | neSi19 [Control Reporter 1, <i>cb-unc-119(+)</i> ] II.<br>(GFP expressed)                                                          |
| WM283 | neSi20 [Control Reporter 2, <i>cb-unc-119(+)</i> ] II.<br>(GFP expressed)                                                          |

**Table S6. List of qPCR Primers, Related to Experimental Procedures**

CMO16209 (21UR-1 RV) CTCAACTGGTGTCGTGGAGTCGGCAATTCAGTTGAGGCACGGTT

CMO16210 (21UR-1 FW) ACACTCCAGCTGGGTGGTACGTACGTTAAC

CMO16225 (mir-52 RV) CTCAACTGGTGTCGTGGAGTCGGCAATTCAGTTGAGAGCACGGA

CMO16226 (mir-52 FW) ACACTCCAGCTGGGCACCCGTACATATGTT

CMO16227 (universal primer for small RNA) CTCAAGTGTCGTGGAGTCGGCAA

CMO13706 (TC3 F) TTCGCCCTGCTCCGTTACTC

CMO13707 (TC3 R) TCATCGGAGAAGACAACCTTTACTCCA

CMO17446 (F54F2.2b F) ATTCCACCACGGGACAAGTC

CMO17447 (F54F2.2b R) GACGGTAACCGATTTTGATACGT

CMO17452 (*bath-45* F) AAAATGTGGACAAACGAGAATTCA

CMO17453 (*bath-45* R) GACTGTGAGATCATCGATAAAGGATACT
